# Supplementary material for: Facile decrease in the electron-transfer rate and surface roughness of gold by ultrasonic treatment
Source: Royal Society of Chemistry journal article supplement (doi:10.1039/c2cc33875k), 2012-01-01
Supplement: c2cc33875k.pdf [file c2cc33875k.pdf]

## Electronic Supplementary Information

### Facile decrease of the electron-transfer rate and surface roughness of gold by ultrasonic treatment

Kyungmin Jo,<sup>a</sup> Gorachand Dutta,<sup>a</sup> Jeong Won Kim<sup>b</sup> and Haesik Yang\*<sup>a</sup>

<sup>a</sup>*Department of Chemistry and Chemistry Institute of Functional Materials,  
Pusan National University, Busan 609-735, Korea*

<sup>b</sup>*Korea Research Institute of Standards and Science, Daejeon 305-340, Korea*

#### Experimental Section

The electrochemical experiments were performed using a CHI405A potentiostat (CH Instruments, Austin, TX, USA). The electrochemical cell consisted of a Au working electrode, a platinum wire counter electrode, and an Ag/AgCl (3 M NaCl) reference electrode. Three types of Au were used as working electrode: Au disk working electrode (diameter = 2 mm, CH Instruments, Austin, TX, USA), Au plate (1,000 Å-thick Au and 50 Å-thick Cr on glass substrate; EMF Corp., Ithaca, NY, USA), and Au wire (diameter = 0.5 mm, Sigma). The surface of the Au disk and Au plate electrode was gently polished with 0.3 μm Al<sub>2</sub>O<sub>3</sub> particles (Buehler, Lake Bluff, IL, USA) on a wet pad (Buehler, Lake Bluff, IL, USA) and rinsed thoroughly with water before use. The Au wire was treated with piranha solution (the piranha solution is a mixture of H<sub>2</sub>SO<sub>4</sub> and 30% of H<sub>2</sub>O<sub>2</sub> (3:1, v/v)) for 10 min at 70° C.

The ultrasonic treatment was performed using a bath-type ultrasonicator (JAC-1002; Kodo, Korea), from which consistent ultrasonic waves were generated by a BLT transducer. Treatment was carried out in 15-min intervals to minimize any temperature increase. Polished Au electrodes were dipped in about 4–5 mL of water in a 10 mL glass beaker, and later transferred to an ultrasonic bath containing about 1100–1200 mL of water for further sonochemical treatment. The ultrasonic power of 15 W was calorimetrically determined, and consistent with previous literature,<sup>S1</sup> although the input power of the ultrasonicator was 125 W. XPS data were obtained using an ESCALAB 250 instrument (VG Scientifics, England). AFM images were acquired using an XE-100 (Park System, Korea), operated in non-contact mode, using the XEI software. ICP-MS data were obtained using an ELAN DRC-e (PerkinElmer, Wellesley, MA, USA). UV-vis spectra were obtained using a UV-1650PC (Shimadzu, Japan).

**Electrochemical Treatment (via Potential Cycling) of Au Disk Electrodes.** Au disk

electrodes were mechanically polished and further electrochemically treated in 0.1 M H<sub>2</sub>SO<sub>4</sub> by applying three potential cycles between -0.1 V and 1.4 V (vs. Ag/AgCl) at a scan rate of 0.1 V/s.<sup>S2,S3</sup> After three cycles, the anodic peak of Au oxidation and the cathodic peak of Au oxide reduction were reproducibly observed.

**Sample Preparation for ICP-MS Measurement.** Sample solutions were prepared by mixing 5 mL of aqua regia (formed by mixing concentrated HNO<sub>3</sub> (70%) and HCl (37%) in a volume ratio of 1:3) and 5 mL of water (where a mechanically polished Au disk electrode (3 mm in diameter) was dipped and ultrasonically treated for 1 h, while a blank solution was prepared with water). Sample solutions were further reacted for 1 h, and then diluted twice with water before ICP-MS measurement. During this sample preparation, initial sample solutions were diluted 4 times.

**Ultrasonic Treatment with Horn-type Ultrasonicator.** Electrochemically treated Au plates were vertically dipped in 30 mL deionized water in a Falcon tube. Ultrasonic Treatment was carried out using Sonosmasher (ULH-700S, Ulso Hightech, Korea) with 15-min intervals for 1 h. To minimize temperature increase, used water was replaced with fresh water after each interval.

## References

- S1. T. Kimura, T. Sakamoto, J.-M. Leveque, H. Sohmiya, M. Fujita, S. Ikeda and T. Ando, *Ultrason. Sonochem.*, 1996, **3**, S157–S161.
- S2. R. O. Córdova, M. E. Martins and A. J. Arvía, *J. Electrochem. Soc.*, 1980, **127**, 2628–2634.
- S3. K. Jo, H. J. Kang and H. Yang, *B. Kor. Chem. Soc.*, 2011, **32**, 728–730.

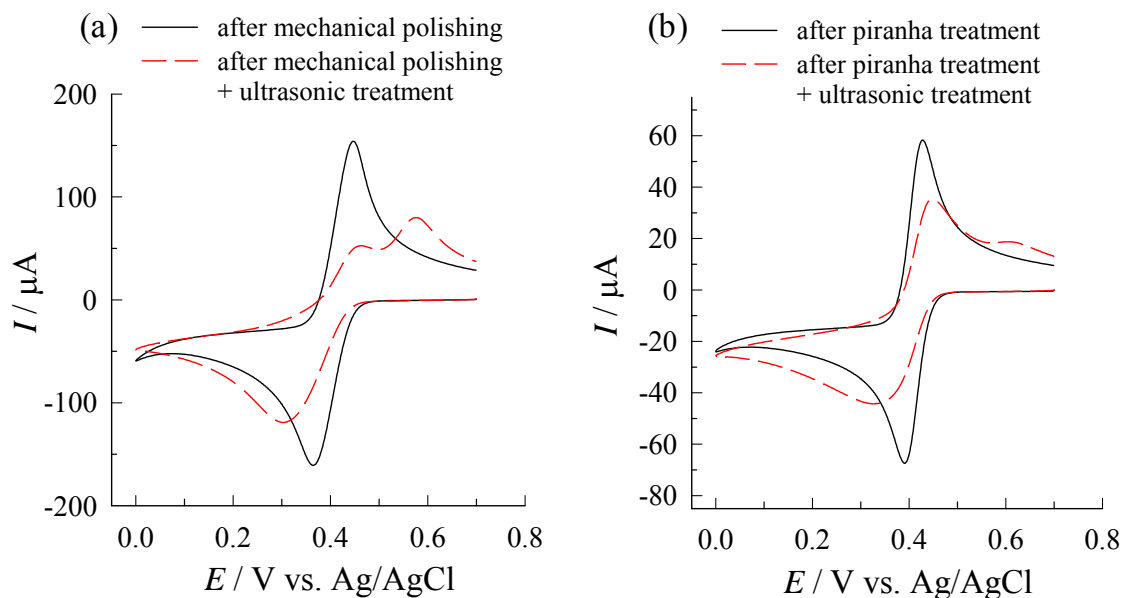

**Fig. S1** Cyclic voltammograms ( $50 \text{ mV s}^{-1}$ ) obtained in a solution containing 1 mM *p*-benzoquinone, 0.1 M  $\text{HClO}_4$ , and 0.1 M  $\text{NaClO}_4$  before and after 2 h ultrasonic treatment of (a) mechanically polished Au plate electrodes and (b) piranha-treated Au wire electrodes.

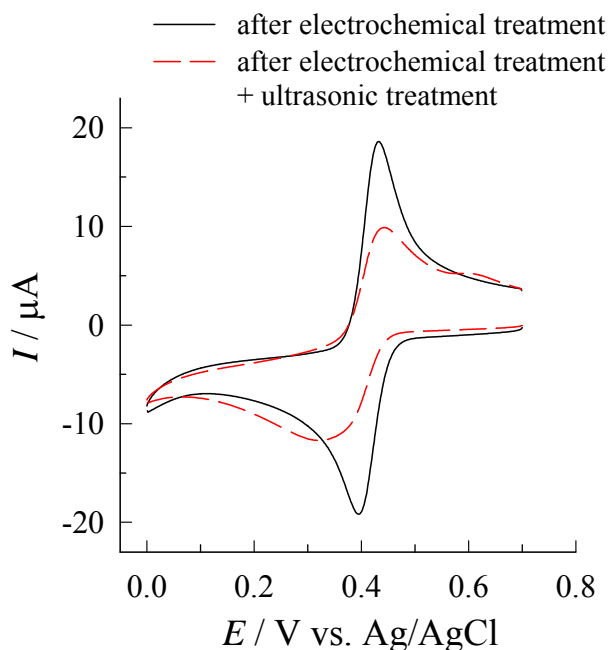

**Fig. S2** Cyclic voltammograms ( $50 \text{ mV s}^{-1}$ ) obtained in a solution containing 1 mM *p*-benzoquinone, 0.1 M  $\text{HClO}_4$ , and 0.1 M  $\text{NaClO}_4$  before and after 2-h ultrasonic treatment of electrochemically treated Au disk electrodes.

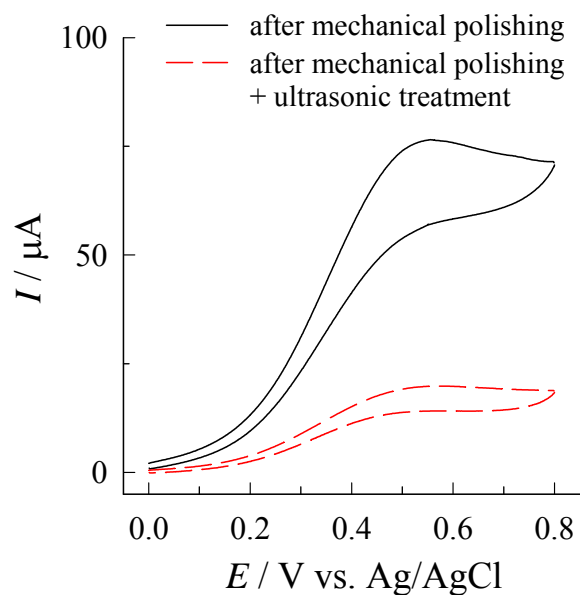

**Fig. S3** Cyclic voltammograms for formic acid oxidation obtained in 0.5 M  $\text{NaHCO}_3$  containing 0.25 M formic acid before and after 2-h ultrasonic treatment of mechanically polished Au disk electrodes.

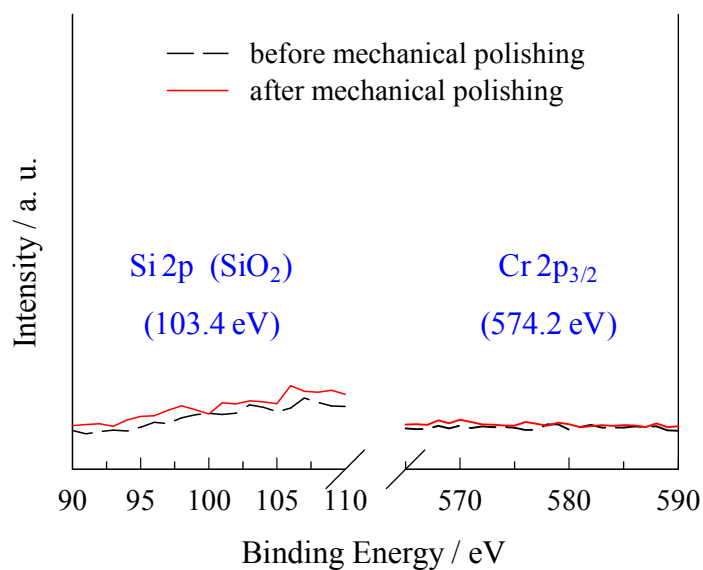

**Fig. S4** XPS spectra for Si 2p (left) and Cr 2p (right) regions before and after mechanical polishing of Au plate electrodes.

**a)**

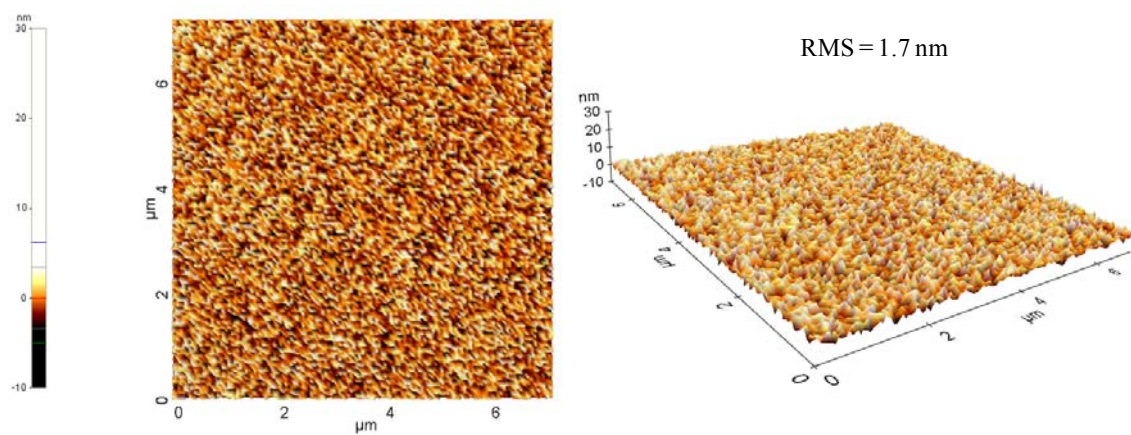

**b)**

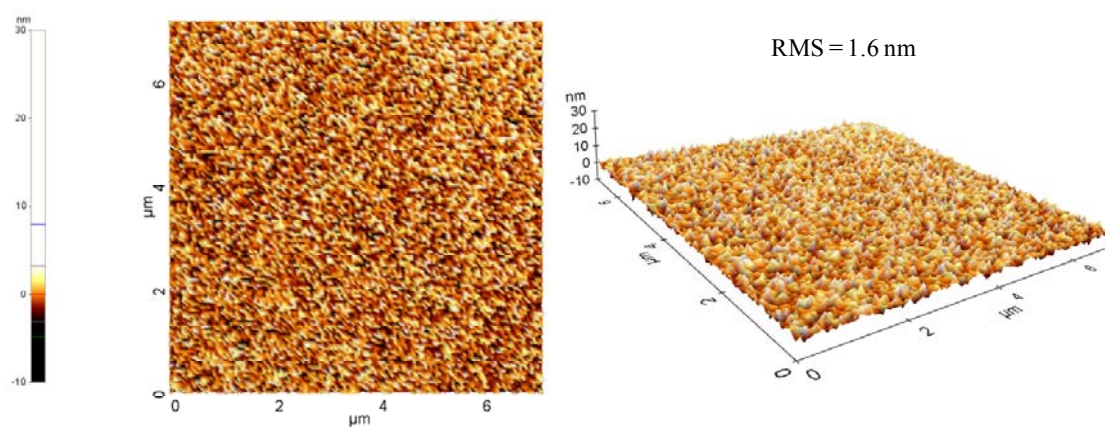

**c)**

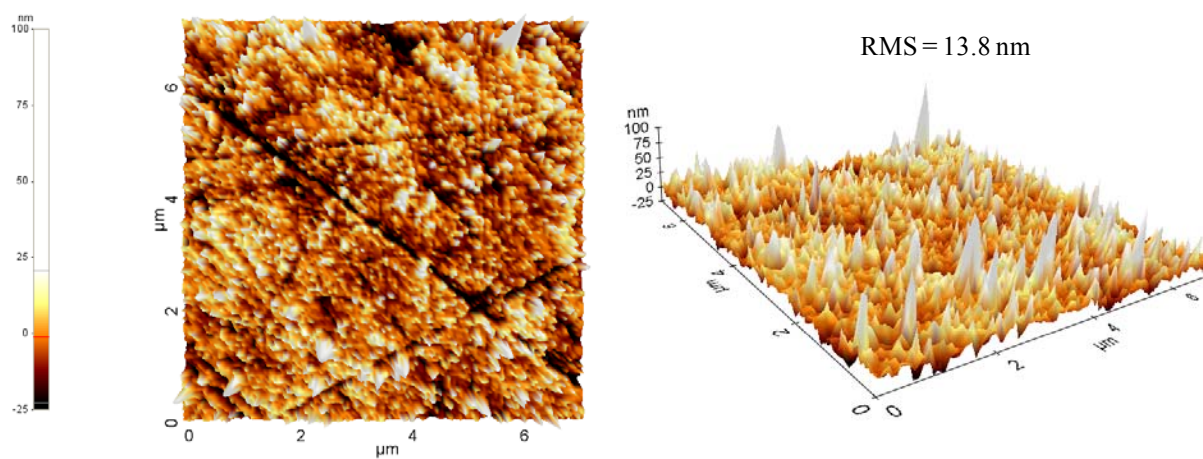

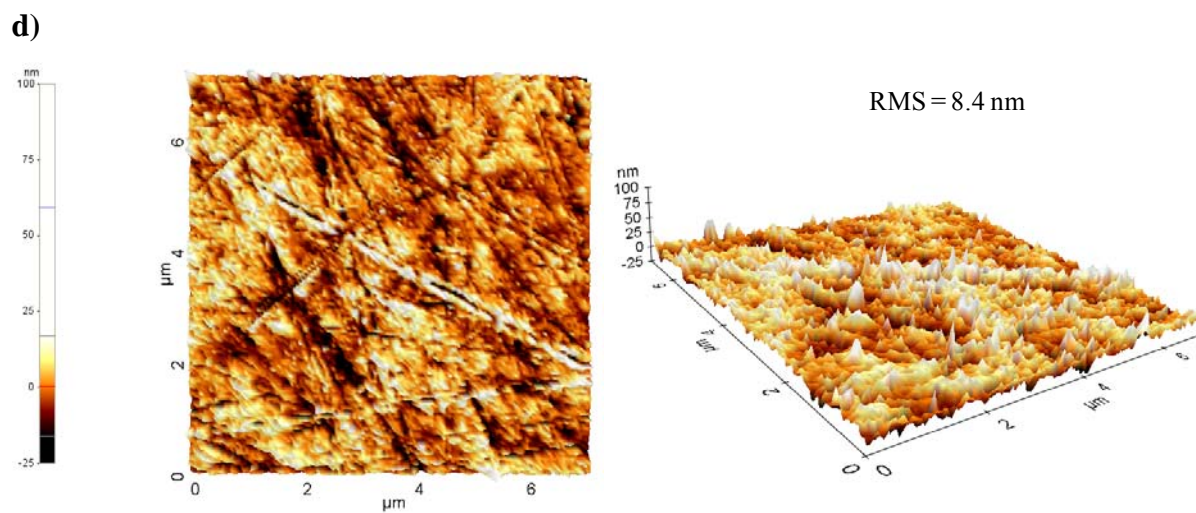

**Fig. S5** AFM images of Au plate electrodes a) before any treatment, b) after 1 h ultrasonic treatment, c) after mechanical polishing, and d) after mechanical polishing followed by 1 h ultrasonic treatment.

## Supporting Discussion

The amount of Au, which is possibly removed from the surface during ultrasonic treatment, is estimated by assuming that Au has face-centered cubic (fcc) unit cell. In each fcc unit cell, there are 8 atoms at the corners and 6 atoms at the faces. Therefore, one unit cell contains 4 atoms. Taking into account the unit cell edge of 4.0786 Å, a volume of 1 nm<sup>3</sup> contains 59 Au atoms. If we consider the removal of 1-nm height for the surface area of 1 mm<sup>2</sup>, which is corresponding to the total volume of 10<sup>12</sup> nm<sup>3</sup>, the number of Au atoms removed during ultrasonic treatment can be estimated as 5.9 × 10<sup>13</sup>. This number is then converted to molar concentration of 19.6 nM (the amount of liquid medium for ultrasonic treatment is 5 mL). Considering the atomic weight of Au (196.97 g/mol), this value corresponds to 3.86 ppb. In Table S1, noticeable changes were not observed for 3-time treatments.

**Table S1.** Amount of Au measured after ultrasonic treatment

| Sample                | Amounts of Au<br>(blank subtracted, in ppb) <sup>[b]</sup> | Estimated change in height (nm) <sup>[c]</sup> |
|-----------------------|------------------------------------------------------------|------------------------------------------------|
| 1st UT <sup>[a]</sup> | 0.47 ± 0.01                                                | 0.07                                           |
| 2nd UT                | 0.41 ± 0.01                                                | 0.06                                           |
| 3rd UT                | 0.15 ± 0.01                                                | 0.04                                           |

[a] UT = Ultrasonic treatment. Each UT was carried out for 1 h. [b] 5-mL volume of water was used as liquid medium for UT with gold plate having surface area of 7.07 mm<sup>2</sup>. [c] Estimations were performed, considering the surface area of 7.07 mm<sup>2</sup> and a dilution factor of 4 during ICP sample preparation.

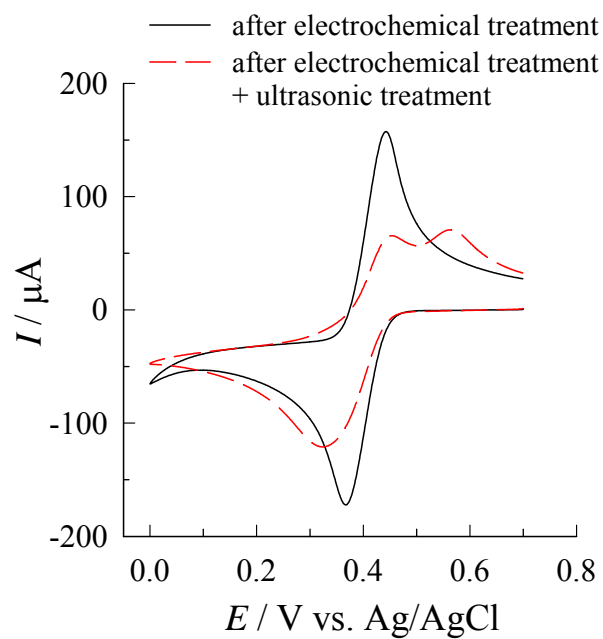

**Fig S6** Cyclic voltammograms ( $50 \text{ mV s}^{-1}$ ) obtained in a solution containing 1 mM *p*-benzoquinone, 0.1 M  $\text{HClO}_4$ , and 0.1 M  $\text{NaClO}_4$  before and after 1-h ultrasonic treatment (horn-type ultrasonicator) of electrochemically treated Au plate electrodes.
